# Supplementary material for: Local injection of infliximab into calcinosis lesions in patients with juvenile dermatomyositis (JDM): a clinical trial
Source: Pediatr Rheumatol Online J. 2024 Jan 2;22:2. doi: 10.1186/s12969-023-00941-5 (PMC10759742; doi:10.1186/s12969-023-00941-5)
Supplement: Supplementary file 1 — Supplementary Material 1 [file 12969_2023_941_MOESM1_ESM.xlsx]

## Sheet: characteristics
ID	Gender	age (year)	Disease duration (Month)	Drug	Number of lesions
1	1	5	18	1	9
2	1	5	17	0	1
3	0	12	48	1	3
4	0	11	60	1	3
5	0	13	108	0	2

## Sheet: lesions size
ID	Visit time	lesion 1 (size) L	lesion 2 (size) L	lesion 3 (size) L	lesion 4 (size) L	lesion 5 (size) L	lesion 6 (size) L	lesion 7 (size) L	lesion 8 (size) L	lesion 9 (size) L	Mean L	Mean diff L	%	lesion 1 (size) W	lesion 2 (size) W	lesion 3 (size) W	lesion 4 (size) W	lesion 5 (size) W	lesion 6 (size) W	lesion 7 (size) W	lesion 8 (size) W	lesion 9 (size) W	Mean W	Mean diff W	%
1	1	5	10	10	10	20	10	10	7	15	10.7778			14	10	6	7	5	4	5	5	4	6.66667
1	2	5	10	11	10	20	12	9	7	14	10.8889	0.11	0.1	15	10	8	8	7	5	5	5	5	7.55556	0.89	13.3
1	3	6	11	10	10	20	10	9	8	14	10.8889	0.11	0.1	14	10	7	7	6	6	6	6	6	7.55556	0.89	13.3
1	4	7	11	11	11	22	11	10	8	16	11.8889	1.11	10.2	15	10	9	8	8	6	7	8	7	8.66667	2	29.9
1	5	6	11	8	8	18	10	11	8	15	10.5556	-0.22	2	10	11	8	8	6	5	8	8	8	8	1.33	19.94
1	6	4	11	8	8	15	8	10	7	14	9.44444	-1.34	12.4	9	11	6	8	5	5	6	7	7	7.11111	0.44	6.5
1	7	4	11	7	6	12	5	8	6	12	7.88889	-2.89	26.8	6	10	7	6	4	5	5	6	5	6	-0.67	10
1	8	3	11	6	6	10	3	7	4	9	6.55556	-4.22	39.14	4	11	5	6	4	3	7	4	3	5.22222	-1.45	21.7
1	9	2	11	4	4	7	2	4	2	7	4.77778	-6	55.6	2	10	3	4	3	1	4	3	2	3.55556	-3.11	46.6
1	10	0	11	2	3	4	1	3	0	3	3	-7.78	72.1	0	11	3	1	2	1	2	0	2	2.44444	-4.23	63.4
1	11	0	11	0	2	2	0	0	0	0	1.66667	-9.11	84.5	0	12	0	1	1	0	0	0	0	1.55556	-5.11	76.6
1	12	0	11	0	0	1	0	0	0	0	1.33333	-9.45	87.6	0	12	0	0	1	0	0	0	0	1.44444	-5.23	78.4
1	13	0	11	0	0	1	0	0	0	0	1.33333	-9.45	87.6	0	11	0	0	1	0	0	0	0	1.33333	-5.34	80
1	14	0	11	0	0	0	0	0	0	0	1.22222	-9.56	88.6	0	10	0	0	0	0	0	0	0	1.11111	-5.56	83.3
1	15	0	10	0	0	0	0	0	0	0	1.11111	-9.67	89.7	0	10	0	0	0	0	0	0	0	1.11111	-5.56	83.3
1	16	0	9	0	0	0	0	0	0	0	1	-9.78	90.7	0	10	0	0	0	0	0	0	0	1.11111	-5.56	83.3
2	1	45									45			45									45
2	2	0									0	-45	100	0									0	-45	100
2	3	0									0	-45	100	0									0	-45	100
2	4	0									0	-45	100	0									0	-45	100
2	5	0									0	-45	100	0									0	-45	100
2	6	0									0	-45	100	0									0	-45	100
2	7	0									0	-45	100	0									0	-45	100
2	8	0									0	-45	100	0									0	-45	100
2	9	0									0	-45	100	0									0	-45	100
2	10	0									0	-45	100	0									0	-45	100
2	11	0									0	-45	100	0									0	-45	100
2	12	0									0	-45	100	0									0	-45	100
2	13	0									0	-45	100	0									0	-45	100
2	14	0									0	-45	100	0									0	-45	100
2	15	0									0	-45	100	0									0	-45	100
2	16	0									0	-45	100	0									0	-45	100
3	1	15	15	12							14			6	5	10							7
3	2	15	15	12							14	0	0	6	6	10							7.33333	0.33	4.7
3	3	15	15	14							14.6667	0.67	4.7	7	6	10							7.66667	0.67	9.5
3	4	15	16	14							15	1	7.1	7	6	10							7.66667	0.67	9.5
3	5	16	16	15							15.6667	1.67	11.9	7	7	9							7.66667	0.67	9.5
3	6	16	17	15							16	2	14.2	8	7	11							8.66667	1.67	23.8
3	7	16	17	13							15.3333	1.33	9.5	8	8	11							9	2	28.5
3	8	16	17	13							15.3333	1.33	9.5	7	8	10							8.33333	1.33	19
3	9	15	16	13							14.6667	0.67	4.7	7	8	9							8	1	14.2
3	10	15	16	8							13	-1	7.1	7	8	7							7.33333	0.33	4.7
3	11	15	16	5							12	-2	14.2	7	7	3							5.66667	-1.33	19
3	12	16	17	4							12.3333	-1.67	11.9	7	7	2							5.33333	-1.67	23.8
3	13	16	16	3							11.6667	-2.33	16.6	6	6	2							4.66667	-2.33	33.2
3	14	16	15	2							11	-3	21.4	6	6	2							4.66667	-2.33	33.2
3	15	16	15	1							10.6667	-3.33	23.7	5	6	1							4	-3	42.8
3	16	15	15	0							10	-4	28.5	5	5	0							3.33333	-3.67	52.4
4	1	10	5	6							7			5	5	6							5.33333
4	2	10	5	6							7	0	0	5	5	6							5.33333	0	0
4	3	10	5	6							7	0	0	6	5	6							5.66667	0.34	6.3
4	4	10	5	6							7	0	0	6	5	6							5.66667	0.34	6.3
4	5	11	5	6							7.33333	0.33	4.7	6	5	7							6	0.67	12.5
4	6	11	5	6							7.33333	0.33	4.7	6	5	7							6	0.67	12.5
4	7	11	5	6							7.33333	0.33	4.7	6	5	7							6	0.67	12.5
4	8	11	5	6							7.33333	0.33	4.7	7	5	7							6.33333	1	18.7
4	9	11	5	6							7.33333	0.33	4.7	7	5	7							6.33333	1	18.7
4	10	11	5	6							7.33333	0.33	4.7	7	5	7							6.33333	1	18.7
4	11	11	5	6							7.33333	0.33	4.7	7	5	7							6.33333	1	18.7
4	12	10	5	6							7	0.33	0	7	5	7							6.33333	1	18.7
4	13	10	5	6							7	0.33	0	6	5	7							6	0.67	12.5
4	14	10	5	6							7	0.33	0	6	5	6							5.66667	0.34	6.3
4	15	9	5	6							6.66667	-0.33	4.7	6	5	6							5.66667	0.34	6.3
4	16	9	5	6							6.66667	-0.33	4.7	5	5	5							5	-0.33	6.19
5	1	30	10								20			15	7								11
5	2	30	10								20	0	0	15	8								11.5	0.5	4.5
5	3	31	10								20.5	0.5	2.5	15	8								11.5	0.5	4.5
5	4	31	11								21	1	5	15	8								11.5	0.5	4.5
5	5	32	11								21.5	1.5	7.5	16	8								12	1	9
5	6	32	11								21.5	1.5	7.5	16	7								11.5	0.5	4.5
5	7	32	11								21.5	1.5	7.5	17	7								12	1	9
5	8	32	11								21.5	1.5	7.5	16	8								12	1	9
5	9	32	12								22	2	10	17	8								12.5	1.5	13.6
5	10	32	12								22	2	10	17	8								12.5	1.5	13.6
5	11	33	12								22.5	2.5	10	16	7								11.5	0.5	4.5
5	12	32	12								22	2	10	16	6								11	0	0
5	13	30	11								20.5	0.5	2.5	15	6								10.5	-0.5	4.5
5	14	29	10								19.5	-0.5	2.5	15	6								10.5	-0.5	4.5
5	15	29	9								19	-1	5	14	6								10	-1	9
5	16	28	9								18.5	-1.5	7.5	14	6								10	-1	9

## Sheet: lesions graphy
ID	graphy time	lesion 1 (size) L	lesion 1 (size) W	lesion 2 (size) L	lesion 2 (size) W	lesion 3 (size) L	lesion 3 (size) W	lesion 4 (size) L	lesion 4 (size) W	lesion 5 (size) L	lesion 5 (size) W	lesion 6 (size) L	lesion 6 (size) W	lesion 7 (size) L	lesion 7 (size) W	lesion 8 (size) L	lesion 8 (size) W	lesion 9 (size) L	lesion 9 (size) W
1	first graphy	13	7	10	7	8	5	8	6	11	4	18	2	10	6	8	6	16	3
1	last graphy	0	0	10	10	0	0	0	0	0	0	0	0	0	0	0	0	0	0
3	first graphy	17	8	16	7	15	10
3	last graphy	16	7	16	7	0	0
4	first graphy	10	6	6	5	6	5
4	last graphy	10	6	6	5	6	5
5	first graphy	25.5	16	8	5
5	last graphy	23	13	8	5
	length
	first graphy	13	10	8	8	11	18	10	8	16	17	16	15	10	6	6	25.5	8	12.0882	12.0882
	last graphy	0	10	0	0	0	0	0	0	0	16	16	0	10	6	6	23	8	5.58824
	width
	first graphy	7	7	5	6	4	2	6	6	3	8	7	10	6	5	5	16	5	6.35294
	last graphy	0	10	0	0	0	0	0	0	0	7	7	0	6	5	5	13	5	3.41176
		First graphy	Last graphy
	Lesions' Length	12.0882	5.58824
	Lesions' Width	6.35294	3.41176

## Sheet: Sheet1
ID	متوسط تغییرات طول ضایعه ها بین ویزیت اول و آخر	متوسط تغییرات عرض ضایعه ها بین ویزیت اول و آخر	درصد تغییرات طول ضایعه ها در ویزیت آخر نسبت به ویزیت اول	درصد تغییرات عرض ضایعه ها در ویزیت آخر نسبت به ویزیت اول
1	-9.78	-5.56	90.7	83.4
2	-45	-45	100	100
3	-4	-3.7	28.5	52.8
4	-0.4	0.33	5.7	6.19
5	-1.5	-1	7.5	9

## Sheet: patient 1
	Visit time	Mean L
	1	10.7778
	2	10.8889
	3	10.8889
	4	11.8889
	5	10.5556
	6	9.44444
	7	7.88889
	8	6.55556
	9	4.77778
	10	3
	11	1.66667
	12	1.33333
	13	1.33333
	14	1.22222
	15	1.11111
	16	1
			Visit time	1	2	3	4	5	6	7	8	9	10	11	12	13	14	15	16
			Mean Length	10.7778	10.8889	10.8889	11.8889	10.5556	9.44444	7.88889	6.55556	4.77778	3	1.66667	1.33333	1.33333	1.22222	1.11111	1
			Visit time	1	2	3	4	5	6	7	8	9	10	11	12	13	14	15	16
			Mean Width	6.66667	7.55556	7.55556	8.66667	8	7.11111	6	5.22222	3.55556	2.44444	1.55556	1.44444	1.33333	1.11111	1.11111	1.11111
		6.66667
		7.55556
		7.55556
		8.66667
		8
		7.11111
		6
		5.22222
		3.55556
		2.44444
		1.55556
		1.44444
		1.33333
		1.11111
		1.11111
		1.11111

## Sheet: patient3
		length	width
	14	14	7
	14	14	7.33333
	14.6667	14.6667	7.66667
	15	15	7.66667			1	2	3	4	5	6	7	8	9	10	11	12	13	14	15	16
	15.6667	15.6667	7.66667		length	14	14	14.6667	15	15.6667	16	15.3333	15.3333	14.6667	13	12	12.3333	11.6667	11	10.6667	10
	16	16	8.66667
	15.3333	15.3333	9
	15.3333	15.3333	8.33333
	14.6667	14.6667	8
	13	13	7.33333
	12	12	5.66667
	12.3333	12.3333	5.33333
	11.6667	11.6667	4.66667			1	2	3	4	5	6	7	8	9	10	11	12	13	14	15	16
	11	11	4.66667		width	7	7.33333	7.66667	7.66667	7.66667	8.66667	9	8.33333	8	7.33333	5.66667	5.33333	4.66667	4.66667	4	3.33333
	10.6667	10.6667	4
	10	10	3.33333

## Sheet: patient 4
length	width
7	5.33333
7	5.33333					1	2	3	4	5	6	7	8	9	10	11	12	13	14	15	16
7	5.66667				Length	7	7	7	7	7.33333	7.33333	7.33333	7.33333	7.33333	7.33333	7.33333	7	7	7	6.66667	6.66667
7	5.66667
7.33333	6					1	2	3	4	5	6	7	8	9	10	11	12	13	14	15	16
7.33333	6				width	5.33333	5.33333	5.66667	5.66667	6	6	6	6.33333	6.33333	6.33333	6.33333	6.33333	6	5.66667	5.66667	5
7.33333	6
7.33333	6.33333
7.33333	6.33333
7.33333	6.33333
7.33333	6.33333
7	6.33333
7	6
7	5.66667
6.66667	5.66667
6.66667	5

## Sheet: patient 5
length	width
20	11		1	2	3	4	5	6	7	8	9	10	11	12	13	14	15	16
20	11.5	length	20	20	20.5	21	21.5	21.5	21.5	21.5	22	22	22.5	22	20.5	19.5	19	18.5
20.5	11.5
21	11.5		1	2	3	4	5	6	7	8	9	10	11	12	13	14	15	16
21.5	12	width	11	11.5	11.5	11.5	12	11.5	12	12	12.5	12.5	11.5	11	10.5	10.5	10	10
21.5	11.5
21.5	12
21.5	12
22	12.5
22	12.5
22.5	11.5
22	11
20.5	10.5
19.5	10.5
19	10
18.5	10
